# Supplementary material for: Cystic fibrosis transmembrane conductance regulator dysfunction in platelets drives lung hyperinflammation
Source: JCI journal article supplement (doi:10.1172/jci129635), 2020-01-21
Supplement: sd1 [file 1]

**Supplemental Table 1.** *CFTR* mRNA qPCR analysis

| <b>Group</b>        | <b>Cells</b>            | <b><math>\Delta</math>CT</b> | <b>Expression Fold Change (%)</b> | <b><i>p</i>*</b> |
|---------------------|-------------------------|------------------------------|-----------------------------------|------------------|
| WT                  | EpCAM <sup>+</sup> lung | 12.7                         |                                   |                  |
|                     |                         |                              |                                   |                  |
| CF <sup>fl/fl</sup> | Peritoneal neutrophils  | 31.4                         | 100                               | <0.05            |
| CF-LysM             | Peritoneal neutrophils  | 42.3                         | <1                                |                  |
|                     |                         |                              |                                   |                  |
| CF <sup>fl/fl</sup> | BM megakaryocytes       | 18.2                         | 100                               | <0.05            |
| CF-PF4              | BM megakaryocytes       | 20.4                         | 21                                |                  |

$\Delta$ CT: Average Ct – GAPDH Ct

Expression Fold Change (%):  $2^{-\Delta\Delta Ct} \times 100$

*n* = 4 - 12 per group

\* Student's *t*-test

**Supplemental Table 2:** CF patient demographics.

|                                            | CF subjects on Orkambi | CF subjects (no modulators)                                                                          |
|--------------------------------------------|------------------------|------------------------------------------------------------------------------------------------------|
| Number                                     | 6                      | 9                                                                                                    |
| Age (years)                                | 35                     | 29                                                                                                   |
| Female (%)                                 | 33                     | 57                                                                                                   |
| BMI                                        | 21.8                   | 22.9                                                                                                 |
| FEV1 (baseline)                            | 61%                    | 58%                                                                                                  |
| FEV1 (after Orkambi)                       | 75%                    | n/a                                                                                                  |
| FVC (baseline)                             | 84%                    | 83%                                                                                                  |
| FVC (after Orkambi)                        | 94%                    | n/a                                                                                                  |
| Inhaled antibiotics                        | 100%                   | 55%                                                                                                  |
| Vest (>daily)                              | 75%                    | 67%                                                                                                  |
| Pancreatic Insufficiency                   | 100%                   | 100%                                                                                                 |
| Genotype                                   | DelF508/DelF508 (all)  | DelF508/DelF508 (5),<br>DelF508/DelI507,<br>DelF508/G542X,<br>DelF508/2657+6G>A,<br>DelF508/398DelTT |
| Exacerbations/yr (baseline)                | 6                      | 2                                                                                                    |
| Exacerbations/yr (after Orkambi)           | 2                      | n/a                                                                                                  |
| <i>Pseudomonas aeruginosa</i> colonization | 100%                   | 67%                                                                                                  |

**A**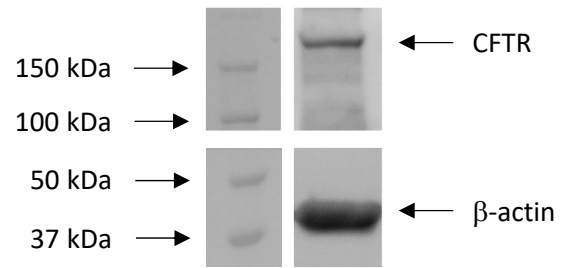**B**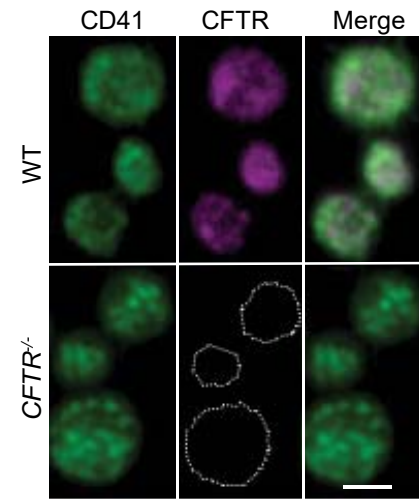

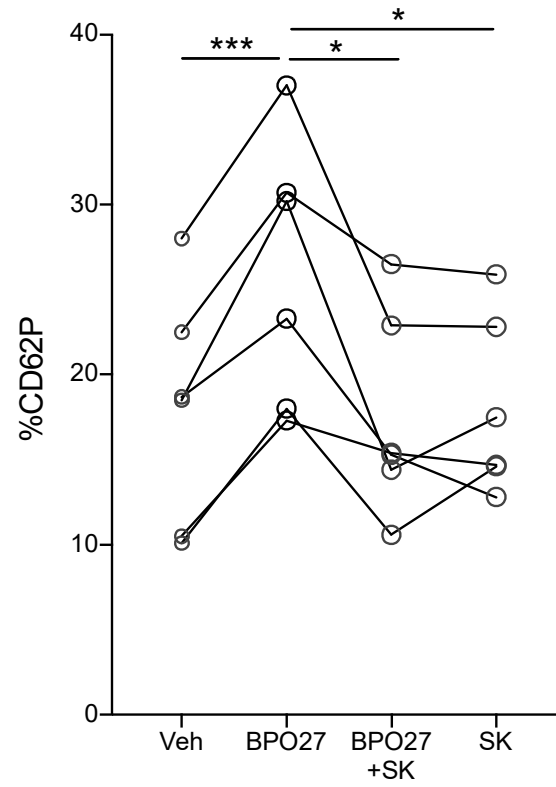

Supplemental Figure 2

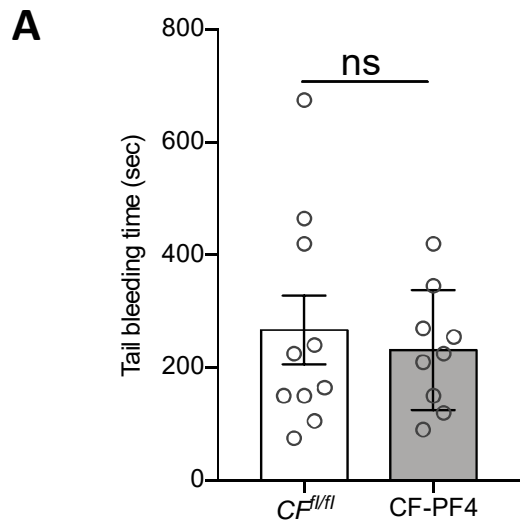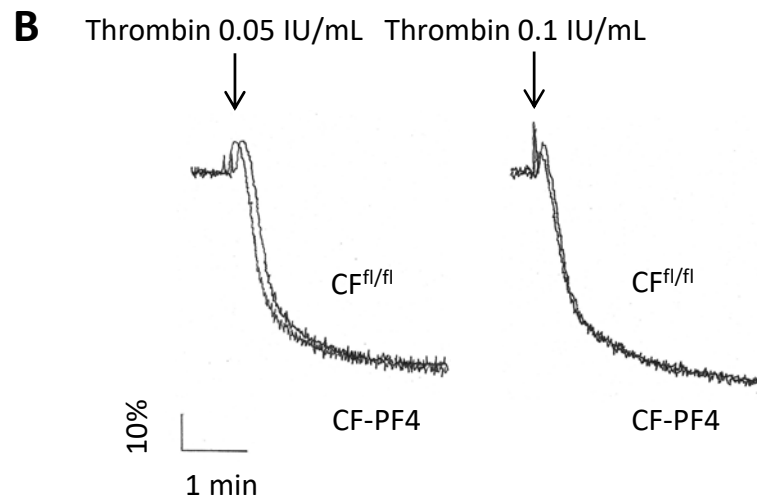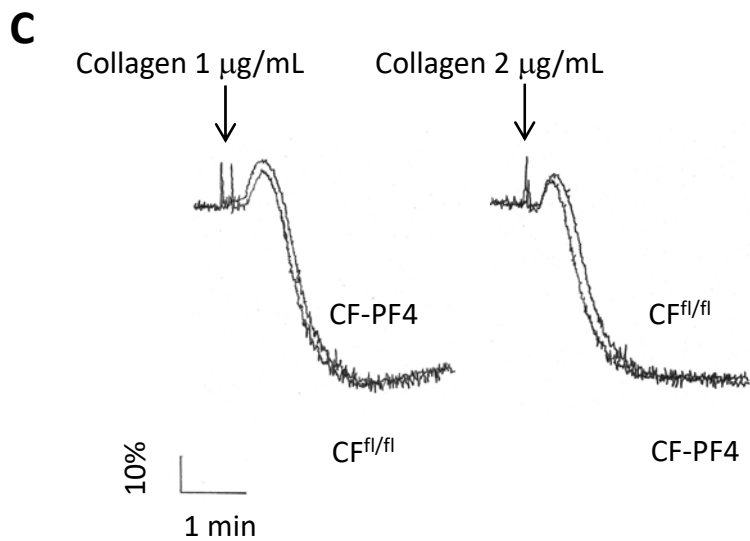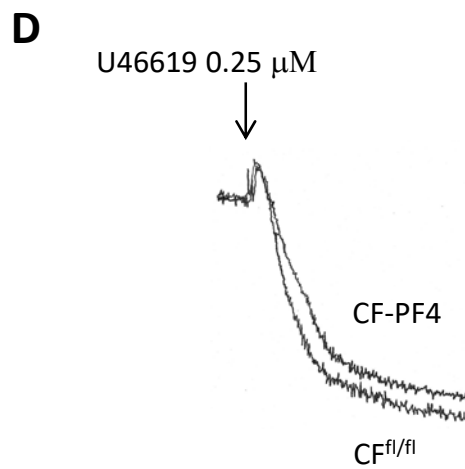

Supplemental Figure 3

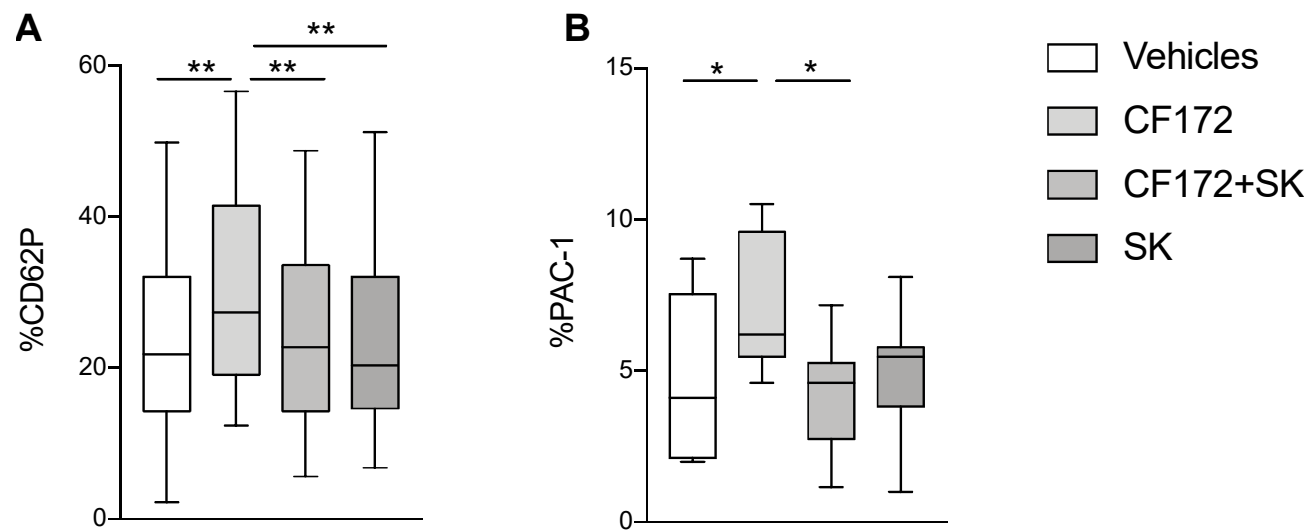

Supplemental Figure 4

**Supplemental Table 1.** *CFTR* mRNA qPCR analysis in cells isolated from WT and CF mice. EpCAM<sup>+</sup> cells obtained from the lungs of WT mice were used as a positive control for this assay. Peritoneal neutrophils were obtained 24 hours after Casein i.p. injection in *CF<sup>fl/fl</sup>* and CF-LysM mice. Bone marrow megakaryocytes were obtained from *CF<sup>fl/fl</sup>* and CF-PF4 mice.  $\Delta$ CT: Average Ct – GAPDH Ct. Expression Fold Change (%):  $2^{-\Delta\Delta Ct} \times 100$ .  $n = 4 - 12$  per group. \* Student's *t*-test

**Supplemental Table 2.** CF patient demographics with variables that reflect lung disease severity including body mass index (BMI), forced expiratory volume at 1 sec (FEV<sub>1</sub>), and forced vital capacity (FVC), exacerbations per year, and colonization with *Pseudomonas aeruginosa*. Extrapulmonary manifestations are noted by pancreatic insufficiency, which all patients have. Genotypes are all homozygous  $\Delta$ F508 in the CF group treated with Orkambi and either homozygous or heterozygous  $\Delta$ F508 with the second allele belonging to Class I-II in the CF group not treated with Orkambi. Enrolling homozygous  $\Delta$ F508 subjects not on Orkambi was difficult as it is an evolving standard of care for this genotype.

**Supplemental Figure 1.** CFTR expression in human and mouse platelets. **(A)** CFTR Western blot analysis from platelets obtained from normal human volunteers. A representative blot is shown from 3 independent experiments. The lanes were run on the same gel but were noncontiguous. **(B)** CD41 and CFTR immunofluorescence staining on platelets isolated from WT and *CFTR<sup>-/-</sup>* mice (representative of 4 independent experiments). A negative control stained with only the secondary antibody showed no fluorescence in either the WT or *CFTR<sup>-/-</sup>* platelets. Scale bar = 2.5  $\mu$ m.

**Supplemental Figure 2.** CD62P expression on WT mouse platelets incubated with an alternative CFTR inhibitor, BPO27, under thrombin-stimulated conditions. Platelets

incubated with BPO27 show increased CD62P expression, which was decreased by incubation with SKF-96365 (SK). Data are mean  $\pm$  SEM of 5 animals per group. \* $p \leq 0.05$ .

**Supplemental Figure 3.** Tail bleeding and platelet aggregation responses in CF mice. **(A)** Tail bleeding times (sec) in *CF<sup>f/f</sup>* and CF-PF4 mice. **(B)** Platelet aggregation responses to thrombin (0.5 IU/mL, 0.1 IU/mL), (c) collagen (1  $\mu$ g/mL, 2  $\mu$ g/mL), and (d) U46619 (0.25  $\mu$ M) in *CF<sup>f/f</sup>* and CF-PF4 mice.

**Supplemental Figure 4.** Human CF platelet activation after thrombin challenge in modified assay with tezacaftor/ivacaftor incubation. Isolated platelets from CF subjects (DeIF508 and one other residual function mutation on tezacaftor/ivacaftor) were incubated with 3  $\mu$ M VX-661 (tezacaftor) and 5  $\mu$ M VX-770 (ivacaftor) throughout the assay described in Figure 5D-E. Platelets were incubated with vehicles, CF172, CF172 + SK, or SK alone, challenged with thrombin, and stained for CD62P **(A)** and PAC-1 expression **(B)**. Data are presented as min-to-max whiskers and box plots showing the median and interquartile ranges.  $n = 10$  subjects. Data were analyzed by 2-way ANOVA. \* $p \leq 0.05$ , \*\* $p \leq 0.01$ .
